# Supplementary material for: The plasma glutamate concentration as a complementary tool to differentiate benign PET-positive lung lesions from lung cancer
Source: Springer Nature journal article supplement (doi:10.1186/s12885-018-4755-1), 2018-09-03

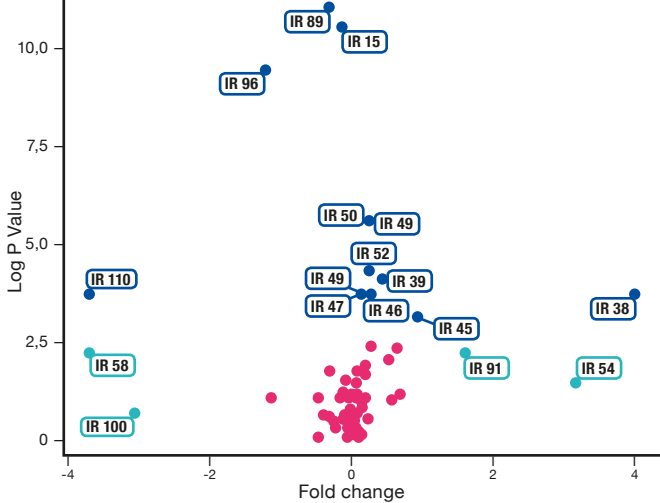

Supplement: MOESM1 [file 16093656]
