# Supplementary material for: The plasma glutamate concentration as a complementary tool to differentiate benign PET-positive lung lesions from lung cancer
Source: Springer Nature journal article supplement (doi:10.1186/s12885-018-4755-1), 2018-09-03

**GLUTAMATE SPIKING  
EXPERIMENT**

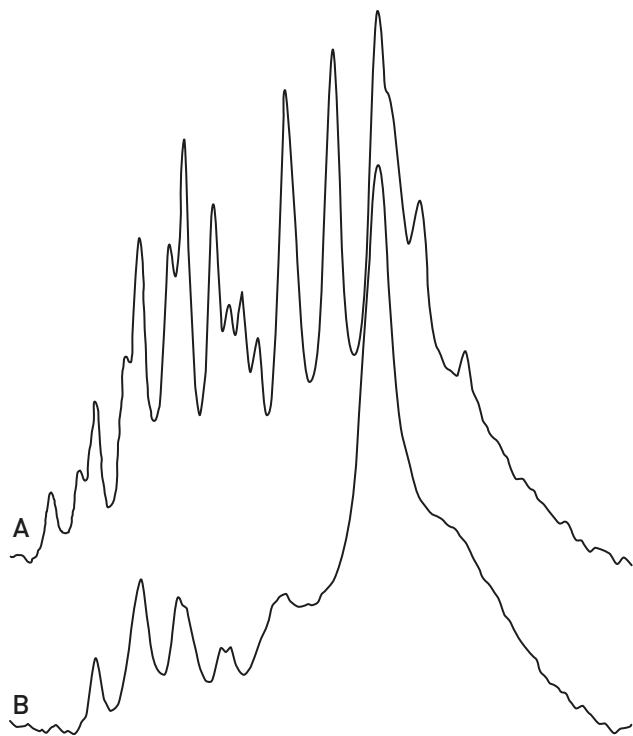

**METHIONINE SPIKING  
EXPERIMENT**

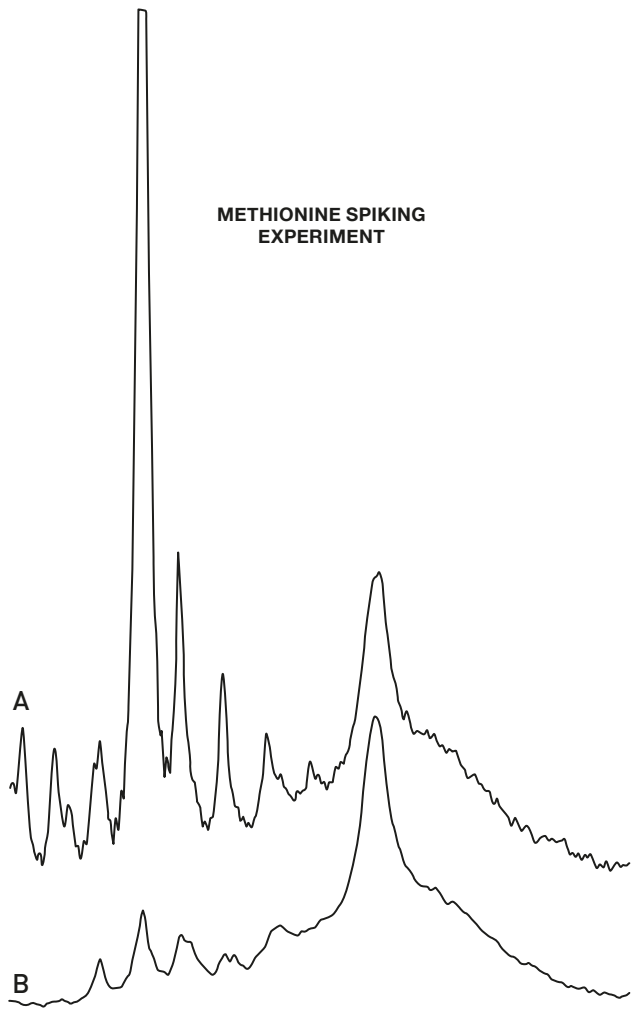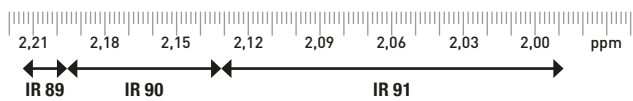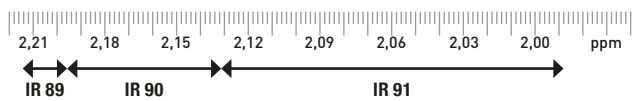

Supplement: MOESM5 [file 16093656]
